# Supplementary material for: Encapsulated Cell Dynamics in Droplet Microfluidic Devices with Sheath Flow
Source: MDPI journal article supplement (doi:10.3390/mi12070839), 2021-07-19
Supplement: s1 [file s1]

# 1 Global Definitions

## Global settings

|                |  |
|----------------|--|
| COMSOL version |  |
|----------------|--|

## Used products

|                      |
|----------------------|
| COMSOL Multiphysics  |
| Microfluidics Module |

# 2 Component 1

## Component settings

|             |    |
|-------------|----|
| Unit system | SI |
|-------------|----|

## 2.1 Definitions

### 2.1.1 Coordinate Systems

#### Boundary System 1

|                        |                 |
|------------------------|-----------------|
| Coordinate system type | Boundary system |
| Tag                    | sys1            |

## 2.2 Geometry 1

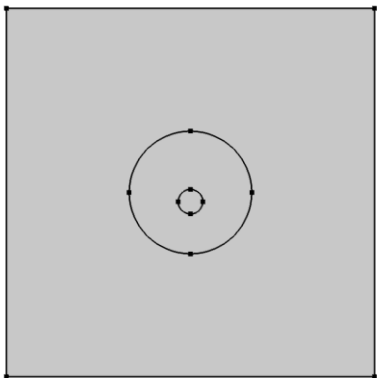

#### Geometry 1

## Units

|              |               |
|--------------|---------------|
| Length unit  | $\mu\text{m}$ |
| Angular unit | deg           |

### Geometry statistics

| Description          | Value |
|----------------------|-------|
| Space dimension      | 2     |
| Number of domains    | 3     |
| Number of boundaries | 12    |
| Number of vertices   | 12    |

#### 2.2.1 Rectangle 1 (r1)

##### Position

| Description | Value  |
|-------------|--------|
| Position    | {0, 0} |
| Base        | Center |

##### Size

| Description | Value |
|-------------|-------|
| Width       | 150   |
| Height      | 150   |

#### 2.2.2 Circle 1 (c1)

##### Position

| Description | Value  |
|-------------|--------|
| Position    | {0, 0} |

##### Size and shape

| Description | Value |
|-------------|-------|
| Radius      | 25    |

#### 2.2.3 Circle 2 (c2)

##### Position

| Description | Value      |
|-------------|------------|
| Position    | {0, -3.75} |

##### Size and shape

| Description | Value |
|-------------|-------|
| Radius      | 5     |

## 2.3 Materials

### 2.3.1 Material 1

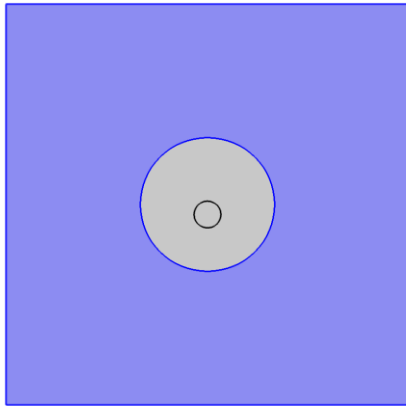

Material 1

#### Selection

|                        |          |
|------------------------|----------|
| Geometric entity level | Domain   |
| Selection              | Domain 1 |

#### Material parameters

| Name              | Value                 | Unit              |
|-------------------|-----------------------|-------------------|
| Density           | 1[g/cm <sup>3</sup> ] | kg/m <sup>3</sup> |
| Dynamic viscosity | 150[mPa*s]            | Pa*s              |

#### Basic Settings

| Description       | Value                 |
|-------------------|-----------------------|
| Density           | 1[g/cm <sup>3</sup> ] |
| Dynamic viscosity | 150[mPa*s]            |

### 2.3.2 Material 2

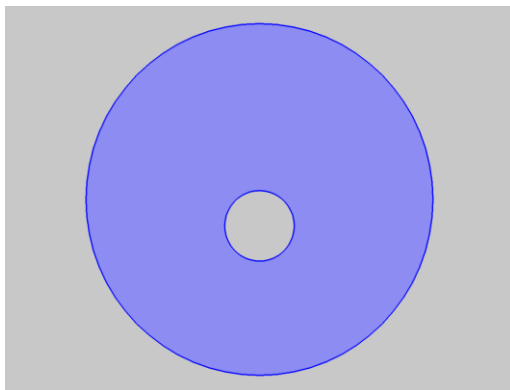

Material 2

#### Selection

|                        |          |
|------------------------|----------|
| Geometric entity level | Domain   |
| Selection              | Domain 2 |

#### Material parameters

| Name              | Value                 | Unit              |
|-------------------|-----------------------|-------------------|
| Density           | 1[g/cm <sup>3</sup> ] | kg/m <sup>3</sup> |
| Dynamic viscosity | 1[mPa*s]              | Pa*s              |

#### Basic Settings

| Description       | Value                 |
|-------------------|-----------------------|
| Density           | 1[g/cm <sup>3</sup> ] |
| Dynamic viscosity | 1[mPa*s]              |

### 2.3.3 Material 3

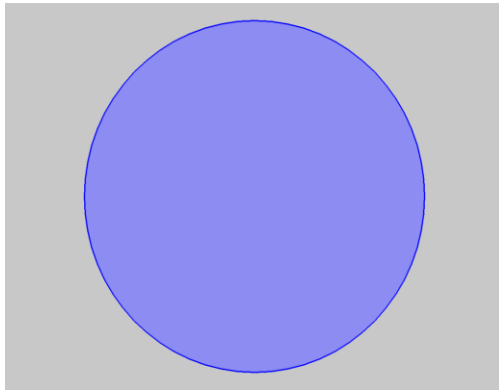

Material 3

#### Selection

|                        |          |
|------------------------|----------|
| Geometric entity level | Domain   |
| Selection              | Domain 3 |

#### Material parameters

| Name              | Value                 | Unit              |
|-------------------|-----------------------|-------------------|
| Density           | 1[g/cm <sup>3</sup> ] | kg/m <sup>3</sup> |
| Dynamic viscosity | 100[mPa*s]            | Pa*s              |

#### Basic Settings

| Description       | Value                 |
|-------------------|-----------------------|
| Density           | 1[g/cm <sup>3</sup> ] |
| Dynamic viscosity | 100[mPa*s]            |

## 2.4 Laminar Two-Phase Flow, Moving Mesh

### Used products

|                      |
|----------------------|
| COMSOL Multiphysics  |
| Microfluidics Module |

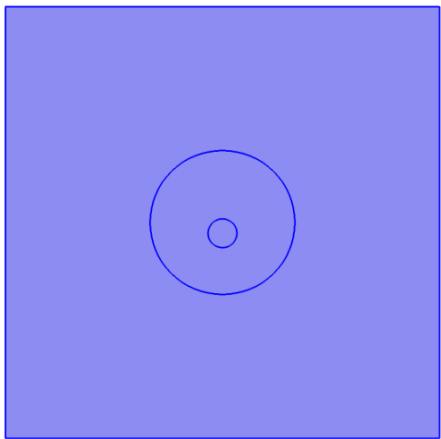

Laminar Two-Phase Flow, Moving Mesh

### Selection

|                        |             |
|------------------------|-------------|
| Geometric entity level | Domain      |
| Selection              | Domains 1–3 |

### Equations

$$\begin{aligned} \rho \frac{\partial \mathbf{u}}{\partial t} + \rho (\mathbf{u} \cdot \nabla) \mathbf{u} = \\ \nabla \cdot \left[ -p \mathbf{I} + \mu (\nabla \mathbf{u} + (\nabla \mathbf{u})^T) \right] + \mathbf{F} \\ \rho \nabla \cdot \mathbf{u} = 0 \end{aligned}$$

### Settings

| Description                                          | Value        |
|------------------------------------------------------|--------------|
| Discretization of fluids                             | P1 + P1      |
| Value type when using splitting of complex variables | {Real, Real} |
| Material frame coordinates                           | {X, Y, Z}    |
| Geometry shape order                                 | 1            |

2.4.1 Free Deformation 1

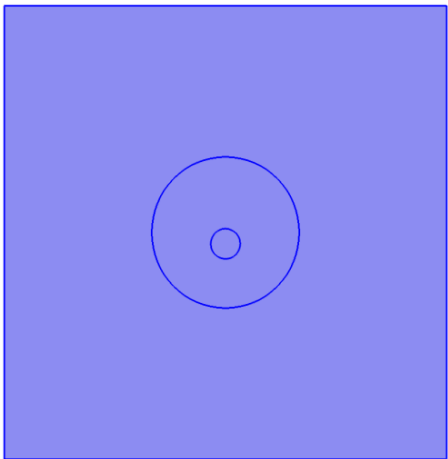

Free Deformation 1

Selection

|                        |             |
|------------------------|-------------|
| Geometric entity level | Domain      |
| Selection              | Domains 1–3 |

Settings

| Description               | Value  |
|---------------------------|--------|
| Initial mesh displacement | {0, 0} |

2.4.2 Prescribed Mesh Displacement 1

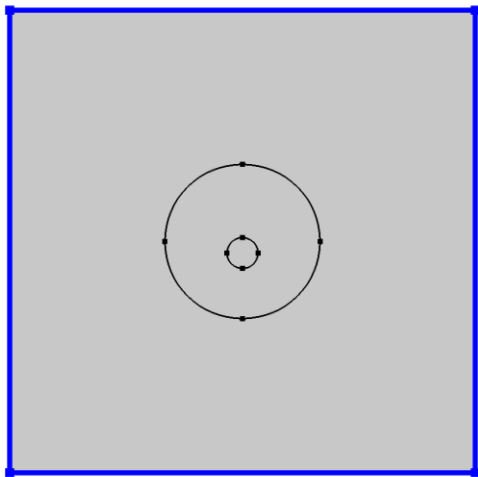

Prescribed Mesh Displacement 1

Selection

|                        |                |
|------------------------|----------------|
| Geometric entity level | Boundary       |
| Selection              | Boundaries 1–4 |

Settings

| Description                  | Value    |
|------------------------------|----------|
| Prescribed # displacement    | {On, On} |
| Prescribed mesh displacement | {0, 0}   |
| Use weak constraints         | Off      |

2.4.3 Wall 1

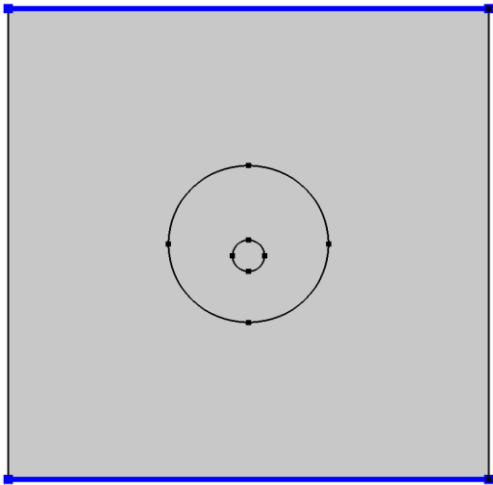

Wall 1

Selection

|                        |                |
|------------------------|----------------|
| Geometric entity level | Boundary       |
| Selection              | Boundaries 2–3 |

Equations

$\mathbf{u} = \mathbf{0}$

Settings

| Description             | Value                          |
|-------------------------|--------------------------------|
| Temperature             | User defined                   |
| Temperature             | 293.15[K]                      |
| Electric field          | User defined                   |
| Electric field          | {0, 0, 0}                      |
| Boundary condition      | No slip                        |
| Apply reaction terms on | Individual dependent variables |
| Use weak constraints    | Off                            |
| Constraint method       | Elemental                      |

2.4.4 Fluid Properties 1

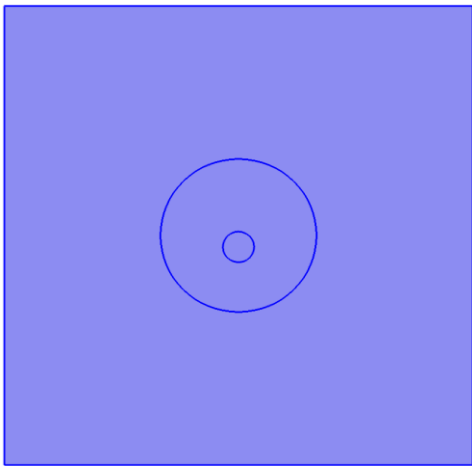

Fluid Properties 1

Selection

|                        |             |
|------------------------|-------------|
| Geometric entity level | Domain      |
| Selection              | Domains 1–3 |

Equations

$$\begin{aligned} \rho \frac{\partial \mathbf{u}}{\partial t} + \rho (\mathbf{u} \cdot \nabla) \mathbf{u} &= \\ \nabla \cdot \left[ -p \mathbf{I} + \mu (\nabla \mathbf{u} + (\nabla \mathbf{u})^T) \right] + \mathbf{F} \\ \nabla \cdot \mathbf{u} &= 0 \end{aligned}$$

Settings

| Description            | Value         |
|------------------------|---------------|
| Density                | From material |
| Dynamic viscosity      | From material |
| Reference length       | 1             |
| Reference length scale | Automatic     |
| Mixing length limit    | Automatic     |

2.4.5 Initial Values 1

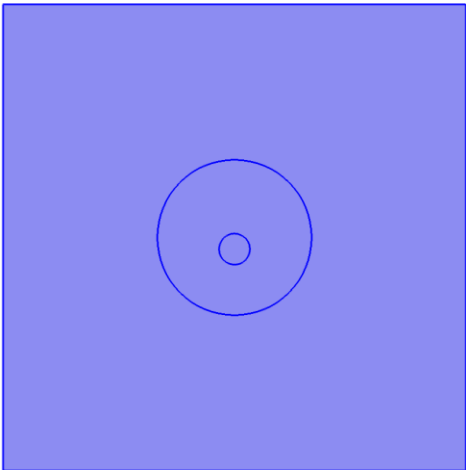

Initial Values 1

Selection

|                        |             |
|------------------------|-------------|
| Geometric entity level | Domain      |
| Selection              | Domains 1–3 |

Settings

| Description    | Value         |
|----------------|---------------|
| Velocity field | $\{0, 0, 0\}$ |
| Pressure       | 0             |

2.4.6 Inlet 1

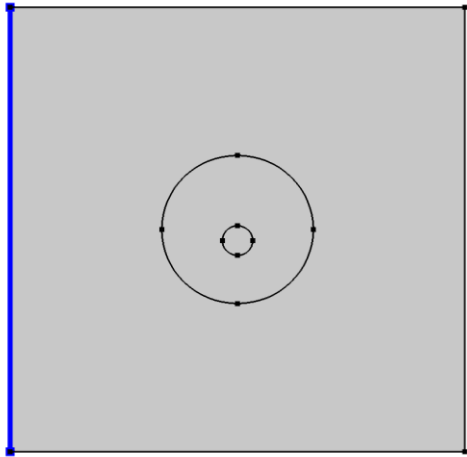

Inlet 1

Selection

|                        |            |
|------------------------|------------|
| Geometric entity level | Boundary   |
| Selection              | Boundary 1 |

Equations

$$L_{entr}\nabla_t\cdot\left[-p\mathbf{I}+\mu\left(\nabla_t\mathbf{u}+(\nabla_t\mathbf{u})^T\right)\right]=-p_{entr}\mathbf{n}$$

Settings

| Description                   | Value              |
|-------------------------------|--------------------|
| Boundary condition            | Laminar inflow     |
| Laminar inflow option         | Flow rate          |
| Flow rate                     | 1[mm^3/min]        |
| Entrance thickness            | 50[um]             |
| Entrance length               | 1200[um]           |
| Constrain endpoints to zero   | Off                |
| Standard pressure             | 1[atm]             |
| Standard molar volume         | 0.0224136[m^3/mol] |
| Normal mass flow rate         | 1e-5[kg/s]         |
| Mass flow type                | Mass flow rate     |
| Standard flow rate defined by | Standard density   |

2.4.7 Outlet 1

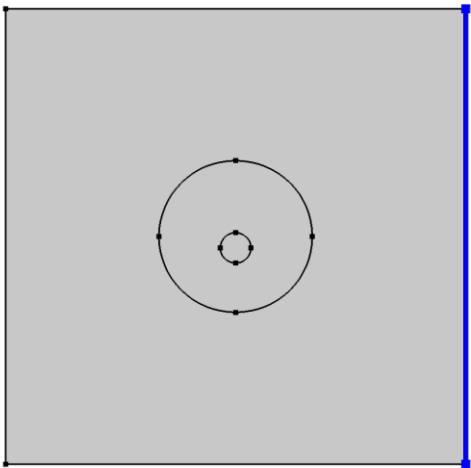

Outlet 1

Selection

|                        |            |
|------------------------|------------|
| Geometric entity level | Boundary   |
| Selection              | Boundary 4 |

Equations

$$\left[-p\mathbf{I}+\mu\left(\nabla\mathbf{u}+(\nabla\mathbf{u})^T\right)\right]\mathbf{n}=-\hat{p}_0\mathbf{n}$$
$$\hat{p}_0\leq p_0$$

Settings

| Description             | Value                   |
|-------------------------|-------------------------|
| Boundary condition      | Pressure                |
| Pressure                | 0                       |
| Normal flow             | Off                     |
| Suppress backflow       | On                      |
| Apply reaction terms on | All physics (symmetric) |
| Use weak constraints    | Off                     |
| Constraint method       | Elemental               |

2.4.8 Fluid-Fluid Interface 1

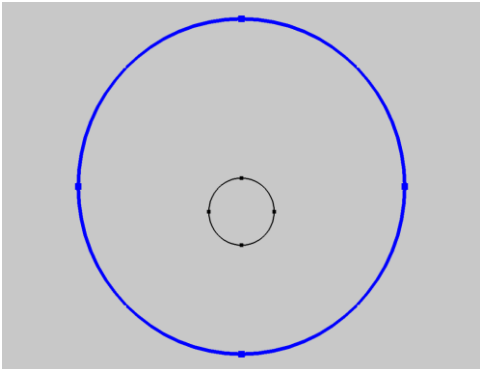

Fluid-Fluid Interface 1

Selection

|                        |                       |
|------------------------|-----------------------|
| Geometric entity level | Boundary              |
| Selection              | Boundaries 5–6, 9, 12 |

Equations

$$\mathbf{u}_1 = \mathbf{u}_2, \quad \mathbf{n}_1 \cdot \mathbf{T}_1 - \mathbf{n}_1 \cdot \mathbf{T}_2 = \sigma(\nabla_t \cdot \mathbf{n}_1)\mathbf{n}_1 - \nabla_t \sigma$$

$$\mathbf{u}_1 = \mathbf{u}_2 + M_f \left( \frac{1}{\rho_1} - \frac{1}{\rho_2} \right) \mathbf{n}_1$$

$$\mathbf{u}_{\text{mesh}} = (\mathbf{u}_1 \cdot \mathbf{n}_1) - \frac{M_f}{\rho_1} \mathbf{n}_1$$

Settings

| Description                 | Value        |
|-----------------------------|--------------|
| Mass flux                   | User defined |
| Mass flux                   | 0            |
| Surface tension coefficient | 5[mN/m]      |
| Surface tension coefficient | User defined |

2.4.9 Fluid-Fluid Interface 2

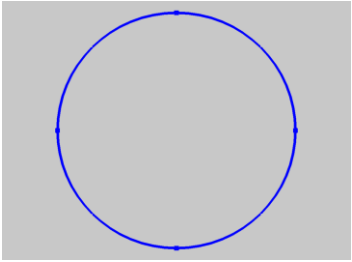

Fluid-Fluid Interface 2

Selection

|                        |                       |
|------------------------|-----------------------|
| Geometric entity level | Boundary              |
| Selection              | Boundaries 7–8, 10–11 |

Equations

$$\begin{aligned} \mathbf{u}_1 &= \mathbf{u}_2, \quad \mathbf{n}_1 \cdot \mathbf{T}_1 - \mathbf{n}_1 \cdot \mathbf{T}_2 = \sigma(\nabla_t \cdot \mathbf{n}_1)\mathbf{n}_1 - \nabla_t \sigma \\ \mathbf{u}_1 &= \mathbf{u}_2 + M_f \left( \frac{1}{\rho_1} - \frac{1}{\rho_2} \right) \mathbf{n}_1 \\ \mathbf{u}_{\text{mesh}} &= (\mathbf{u}_1 \cdot \mathbf{n}_1) - \frac{M_f}{\rho_1} \mathbf{n}_1 \end{aligned}$$

Settings

| Description                 | Value        |
|-----------------------------|--------------|
| Mass flux                   | User defined |
| Mass flux                   | 0            |
| Surface tension coefficient | 1[mN/m]      |
| Surface tension coefficient | User defined |

2.4.10 Volume Force 1

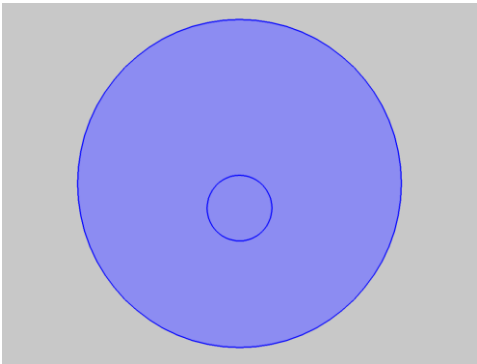

Volume Force 1

Selection

|                        |             |
|------------------------|-------------|
| Geometric entity level | Domain      |
| Selection              | Domains 2–3 |

Equations

$$\rho \frac{\partial \mathbf{u}}{\partial t} + \rho (\mathbf{u} \cdot \nabla) \mathbf{u} =$$
$$\nabla \cdot \left[ -p \mathbf{I} + \mu (\nabla \mathbf{u} + (\nabla \mathbf{u})^T) \right] + \mathbf{F}.$$

Settings

| Description  | Value                                 |
|--------------|---------------------------------------|
| Volume force | {-3.25[nN]/(4/3*pi*(25[um])^3), 0, 0} |

2.5 Meshes

2.5.1 Mesh 1

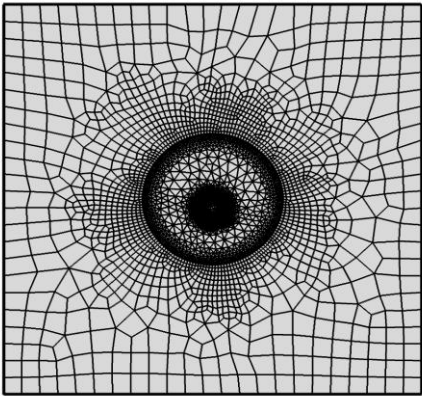

Mesh 1

Size (size)

Free Triangular 1 (ftri1)

Selection

|                        |             |
|------------------------|-------------|
| Geometric entity level | Domain      |
| Selection              | Domains 2–3 |

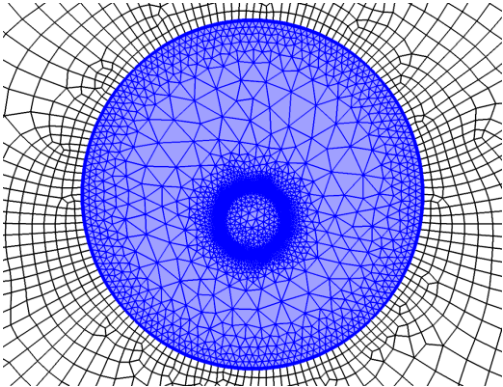

Free Triangular 1

Size 1 (size1)

Selection

|                        |                       |
|------------------------|-----------------------|
| Geometric entity level | Boundary              |
| Selection              | Boundaries 5–6, 9, 12 |

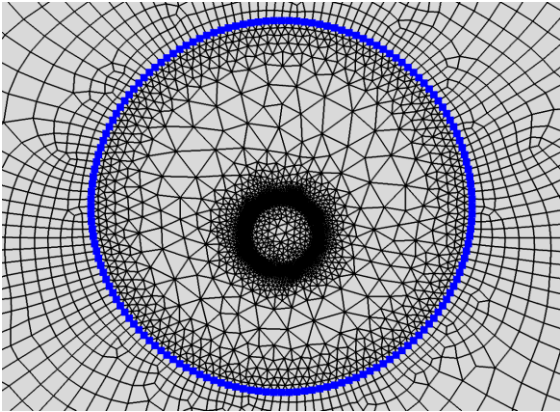

Size 1

Settings

| Description                 | Value          |
|-----------------------------|----------------|
| Calibrate for               | Fluid dynamics |
| Maximum element size        | 1.01           |
| Minimum element size        | 0.003          |
| Curvature factor            | 0.2            |
| Maximum element growth rate | 1.05           |
| Predefined size             | Extremely fine |

Size 2 (size2)

Selection

|                        |                       |
|------------------------|-----------------------|
| Geometric entity level | Boundary              |
| Selection              | Boundaries 7–8, 10–11 |

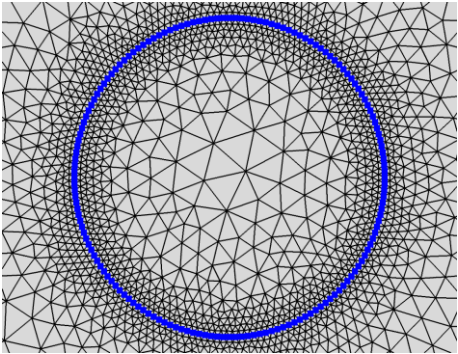

Size 2

### Settings

| Description                  | Value          |
|------------------------------|----------------|
| Calibrate for                | Fluid dynamics |
| Maximum element size         | 0.2            |
| Minimum element size         | 0.003          |
| Minimum element size         | Off            |
| Curvature factor             | 0.2            |
| Curvature factor             | Off            |
| Resolution of narrow regions | Off            |
| Maximum element growth rate  | 1.05           |
| Maximum element growth rate  | Off            |
| Predefined size              | Extremely fine |
| Custom element size          | Custom         |

### Free Quad 2 (fq2)

#### Selection

|                        |          |
|------------------------|----------|
| Geometric entity level | Domain   |
| Selection              | Domain 1 |

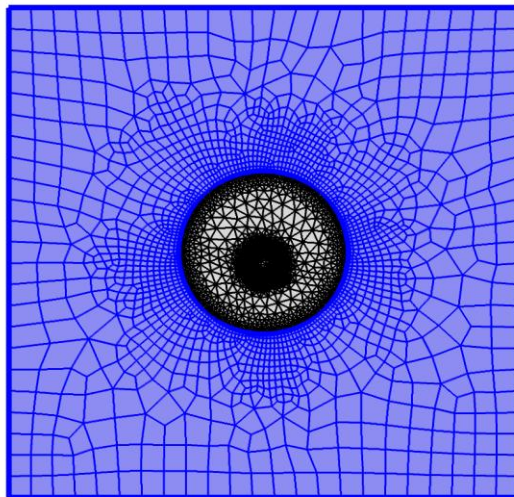

### Free Quad 2

### Size 1 (size1)

#### Selection

|                        |                |
|------------------------|----------------|
| Geometric entity level | Boundary       |
| Selection              | Boundaries 1–4 |

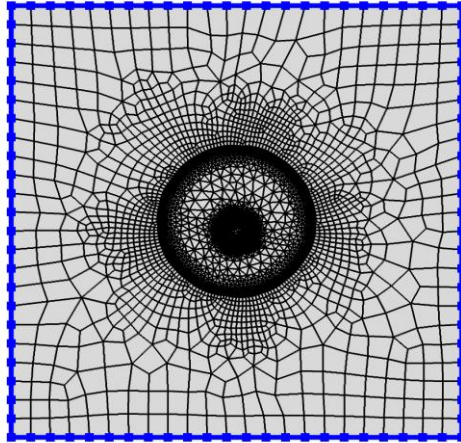

Size 1

#### Settings

| Description                 | Value          |
|-----------------------------|----------------|
| Calibrate for               | Fluid dynamics |
| Maximum element size        | 6.75           |
| Minimum element size        | 0.3            |
| Curvature factor            | 0.3            |
| Maximum element growth rate | 1.15           |

### 3 Study 1

#### Computation information

|                  |                                                   |
|------------------|---------------------------------------------------|
| Computation time | 19 min 23 s                                       |
| CPU              | Intel(R) Core(TM) i5-2410M CPU @ 2.30GHz, 2 cores |
| Operating system | Windows 7                                         |

#### 3.1 Time Dependent

##### Study settings

| Description                    | Value |
|--------------------------------|-------|
| Include geometric nonlinearity | Off   |

| Times                      | Unit |
|----------------------------|------|
| range(0[ms],1[ms],600[ms]) | s    |

##### Physics and variables selection

| Physics interface                           | Discretization |
|---------------------------------------------|----------------|
| Laminar Two-Phase Flow, Moving Mesh (tpfmm) | physics        |

#### Mesh selection

| Geometry           | Mesh  |
|--------------------|-------|
| Geometry 1 (geom1) | mesh1 |

## 3.2 Solver Configurations

### 3.2.1 Solution 1

*Compile Equations: Time Dependent (st1)*

#### Study and step

| Description    | Value                          |
|----------------|--------------------------------|
| Use study      | <a href="#">Study 1</a>        |
| Use study step | <a href="#">Time Dependent</a> |

*Dependent Variables 1 (v1)*

#### General

| Description           | Value                          |
|-----------------------|--------------------------------|
| Defined by study step | <a href="#">Time Dependent</a> |

#### Initial values of variables solved for

| Description | Value                               |
|-------------|-------------------------------------|
| Solution    | <a href="#">Remeshed Solution 1</a> |

*Time-Dependent Solver 1 (t1)*

#### Absolute tolerance

| Description   | Value    |
|---------------|----------|
| Global method | Unscaled |

#### Time stepping

| Description       | Value             |
|-------------------|-------------------|
| Maximum BDF order | 2                 |
| Error estimation  | Exclude algebraic |

#### Results while solving

| Description | Value                            |
|-------------|----------------------------------|
| Plot        | On                               |
| Plot group  | <a href="#">Velocity (tpfmm)</a> |

## Automatic Remeshing (arDef)

### General

| Description        | Value                      |
|--------------------|----------------------------|
| Remesh in geometry | <a href="#">Geometry 1</a> |

### Condition for remeshing

| Description                     | Value                  |
|---------------------------------|------------------------|
| Mesh quality expression         | comp1.tpfmtm.relVolMin |
| Stop when mesh quality is below | 0.6                    |

## Fully Coupled 1 (fc1)

### General

| Description   | Value                    |
|---------------|--------------------------|
| Linear solver | <a href="#">Direct 1</a> |

### Method and termination

| Description                  | Value              |
|------------------------------|--------------------|
| Jacobian update              | On every iteration |
| Maximum number of iterations | 8                  |

### Results while solving

| Description | Value                             |
|-------------|-----------------------------------|
| Plot        | On                                |
| Plot group  | <a href="#">Velocity (tpfmtm)</a> |

## Direct 1 (d1)

### General

| Description                              | Value   |
|------------------------------------------|---------|
| Solver                                   | PARDISO |
| Multithreaded forward and backward solve | Off     |
